# Supplementary material for: Morphology of Third Mandibular Molars – An In Vivo Cone Beam Computed Tomography Study in Lower Silesia
Source: Research Square preprint supplement (doi:10.21203/rs.3.rs-8282672/v1), 2026-02-09
Supplement: Supplementary file 1 [file 140c7622a0b4c8730d7e530b.xlsx]

## Sheet: Sheet1
Table 7 Root canal configurations of MTMs with Different Root Numbers in the Present Study and Previous Studies
Author	No. of roots	existing roots	Root	Population	I (%)	II (%)	III (%)	IV (%)	V (%)	VI (%)	VII (%)	VIII (%)	Others (%)	Total (n)	I (n)	II (n)	III (n)	IV (n)	V (n)	VI (n)	VII (n)	VIII (n)	Others (n)	Study method	Sample size (no. of MTMs)	Cohen's kappa
# Present study	1	single root	single root	Poland	0.409091	0.0909091		0.318182	0.0454545			0.136364		22	9	2		7	1			3		CBCT	261	0.917
# Present study	2	M, D	M	Poland	0.640777	0.038835	0.00970874	0.300971	0.00970874					206	132	8	2	62	2					CBCT	261	0.917
# Present study	2	M, D	D	Poland	0.946602	0.0194175		0.0242718		0.00485437		0.00485437		206	195	4		5		1		1		CBCT	261	0.917
# Present study	3	MB,ML,D	ML	Poland	1									23	23									CBCT	261	0.917
# Present study	3	MB,ML,D	MB	Poland	1									23	23									CBCT	261	0.917
# Present study	3	MB,ML,D	D	Poland	0.956522			0.0434783						23	22			1						CBCT	261	0.917
# Present study	3	M, DB, DL	M	Poland	0.75			0.25						8	6			2						CBCT	261	0.917
# Present study	3	M, DB, DL	DL	Poland	0.875				0.125					8	7				1					CBCT	261	0.917
# Present study	3	M, DB, DL	DB	Poland	1									8	8									CBCT	261	0.917
# Present study	2 -fused	M, D	M	Poland	0.5				0.5					2	1				1					CBCT	261	0.917
# Present study	2 -fused	M, D	D	Poland										2	2									CBCT	261	0.917
Ahmad	1	single root	single root	Jordan	0.555556	0.222222	0.111111				0.111111			9	5	2	1				1			staining and clearing	70	-
Ahmad	2	M, D	M	Jordan	0.40625	0.1875	0.03125	0.28125	0.09375					32	13	6	1	9	3					staining and clearing	70	-
Ahmad	2	M, D	D	Jordan	0.9375	0.03125		0.03125						32	30	1		1						staining and clearing	70	-
Ahmad	3	M, DB, DL	M	Jordan	0.5	0.5								2	1	1								staining and clearing	70	-
Ahmad	3	M, DB, DL	DL	Jordan	1									2	2									staining and clearing	70	-
Ahmad	3	M, DB, DL	DB	Jordan	1									2	2									staining and clearing	70	-
Ahmad	4	Mb, ML, DB, DL	ML	Jordan	1									2	2									staining and clearing	70	-
Ahmad	4	Mb, ML, DB, DL	MB	Jordan	1									2	2									staining and clearing	70	-
Ahmad	4	Mb, ML, DB, DL	DL	Jordan	1									2	2									staining and clearing	70	-
Ahmad	4	Mb, ML, DB, DL	DB	Jordan	1									2	2									staining and clearing	70	-
Ahmad	2 -fused	2 -fused	2 -fused	Jordan				0.45				0.15	0.4	20				9				3	8	staining and clearing	70	-
Ahmad	3 -all fused	3 -all fused	3 -all fused	Jordan								0.666667	0.333333	3								2	1	staining and clearing	70	-
Ahmad	3 -two fused	(MB ML), D	D	Jordan							1			1							1			staining and clearing	70	-
Ahmad	3 -two fused	(MB ML), D	(MB ML)	Jordan							1			1							1			staining and clearing	70	-
Al-Qudah	1	single root	single root	Jordan	0.4375	0.125	0.0625	0.125	0.1875	0.0625				16	7	2	1	2	3	1				staining and clearing	639	-
Al-Qudah	2	M, D	M	Jordan	0.266667	0.184762	0.0285714	0.447619	0.0285714	0.0285714	0.00761905	0.00761905		525	140	97	15	235	15	15	4	4		staining and clearing	639	-
Al-Qudah	2	M, D	D	Jordan	0.892157	0.00784314	0.0117647	0.0823529	0.00588235					510	455	4	6	42	3					staining and clearing	639	-
Al-Qudah	3	M, DB, DL	M	Jordan	0.722222	0.0555556		0.0555556	0.166667					18	13	1		1	3					staining and clearing	639	-
Al-Qudah	3	M, DB, DL	DL	Jordan	1									18	18									staining and clearing	639	-
Al-Qudah	3	M, DB, DL	DB	Jordan	0.888889				0.111111					18	16				2					staining and clearing	639	-
Al-Qudah	2 -fused	2 -fused	2 -fused	Jordan		0.125		0.46875	0.015625			0.0625	0.328125	64		8		30	1			4	21	staining and clearing	639	-
Al-Qudah	3 -all fused	all roots fused	3 -all fused	Jordan								0.444444	0.555556	9								4	5	staining and clearing	639	-
Al-Qudah	3 -two fused	(M, DL), D	D	Jordan	0.888889	0.0555556		0.0555556						18	16	1		1						staining and clearing	639	-
Al-Qudah	3 -two fused	(M, DL), D	(M DL)	Jordan				0.833333	0.0555556			0.0555556	0.0555556	18				15	1			1	1	staining and clearing	639	-
Al-Qudah	3 -two fused	(D, DL), M	M	Jordan	0.5	0.5								2	1	1								staining and clearing	639	-
Al-Qudah	3 -two fused	(D, DL), M	(D DL)	Jordan				0.5	0.5					2				1	1					staining and clearing	639	-
Priyank	1	single root	single root	India	0.625	0.25	0.125							8	5	2	1							CBCT	277	0.77
Priyank	2	M, D	M	India	0.0871212	0.670455	0.162879	0.0530303	0.0189394	0.00757576				264	23	177	43	14	5	2				CBCT	277	0.77
Priyank	2	M, D	D	India	0.791667	0.109848	0.0378788	0.030303	0.0113636	0.0189394				264	209	29	10	8	3	5				CBCT	277	0.77
Priyank	3	M, DB, DL	M	India		0.75	0.25							4		3	1							CBCT	277	0.77
Priyank	3	M, DB, DL	DL	India	0.75		0.25							4	3		1							CBCT	277	0.77
Priyank	3	M, DB, DL	DB	India	1									4	4									CBCT	277	0.77
Priyank	5	ML, MB, DL, DB, B	ML	India			1							1			1							CBCT	277	0.77
Priyank	5	ML, MB, DL, DB, B	MB	India				1						1				1						CBCT	277	0.77
Priyank	5	ML, MB, DL, DB, B	DL	India			1							1			1							CBCT	277	0.77
Priyank	5	ML, MB, DL, DB, B	DB	India				1						1				1						CBCT	277	0.77
Priyank	5	ML, MB, DL, DB, B	B	India			1							1			1							CBCT	277	0.77
Singh	1	single root	single root	India	0.533333	0.2	0.0666667					0.0666667	0.133333	15	8	3	1					1	2	staining and clearing	100	-
Singh	2	M, D	M	India	0.460317	0.444444		0.0793651	0.015873					63	29	28		5	1					staining and clearing	100	-
Singh	2	M, D	D	India	0.968254	0.031746								63	61	2								staining and clearing	100	-
Singh	3	M, DB, DL	M	India	0.777778	0.166667		0.0555556						18	14	3		1						staining and clearing	100	-
Singh	3	M, DB, DL	DL	India	1									18	18									staining and clearing	100	-
Singh	3	M, DB, DL	DB	India	1									18	18									staining and clearing	100	-
Singh	4	Mb, ML, DB, DL	ML	India	1									4	4									staining and clearing	100	-
Singh	4	Mb, ML, DB, DL	MB	India	1									4	4									staining and clearing	100	-
Singh	4	Mb, ML, DB, DL	DL	India	1									4	4									staining and clearing	100	-
Singh	4	Mb, ML, DB, DL	DB	India	1									4	4									staining and clearing	100	-
Somasundaram	1	single root	single root	India	0.333333	0.333333		0.333333						6	2	2		2						CBCT	171	0.897
Somasundaram	2	M, D	M	India	0.180556	0.555556	0.0277778	0.222222	0.0138889					144	26	80	4	32	2					CBCT	171	0.897
Somasundaram	2	M, D	D	India	0.875	0.0972222		0.0277778						144	126	14		4						CBCT	171	0.897
Somasundaram	3	M, DB, DL	M	India		0.5		0.5						4		2		2						CBCT	171	0.897
Somasundaram	3	M, DB, DL	DL	India	1									4	4									CBCT	171	0.897
Somasundaram	3	M, DB, DL	DB	India				1						4				4						CBCT	171	0.897
Somasundaram	5	ML, MB, DL, DB, B	ML	India	1									1	1									CBCT	171	0.897
Somasundaram	5	ML, MB, DL, DB, B	MB	India	1									1	1									CBCT	171	0.897
Somasundaram	5	ML, MB, DL, DB, B	DL	India	1									1	1									CBCT	171	0.897
Somasundaram	5	ML, MB, DL, DB, B	DB	India					1					1					1					CBCT	171	0.897
Somasundaram	5	ML, MB, DL, DB, B	B	India				1						1				1						CBCT	171	0.897
