# Supplementary material for: Morphology of Third Mandibular Molars – An In Vivo Cone Beam Computed Tomography Study in Lower Silesia
Source: Research Square preprint supplement (doi:10.21203/rs.3.rs-8282672/v1), 2026-02-09
Supplement: Supplementary file 2 [file 1625c0d3b68b66180d87658a.xlsx]

## Sheet: Arkusz1
Date of the examination	Number	Surname	Name	Sex	Date of birth	Tooth 38	Number of roots	Mesial canal (M) Vertucci type	Distal canal (D) Vertucci type	Mesiobuccal canal (MB) Vertucci type	Mesiolingual canal (ML) Vertucci type	Middle mesial canal (MM) Vertucci type	Distobuccal canal (DB) Vertucci type	Distolingual canal (DL) Vertucci type	Buccal canal (B) Vertucci type	Additioncal canal 1 Vertucci type	Type C canal	Fused roots
2022-02-01	13	X	X	m	2021-12-02	A	-	-	-	-	-	-	-	-	-	-	-	-
2022-01-31	18	X	X	m	1995-06-15	A	-	-	-	-	-	-	-	-	-	-	-	-
2022-02-08	29	X	X	f	1969-03-30	A	-	-	-	-	-	-	-	-	-	-	-	-
2022-02-21	80	X	X	f	1988-01-13	A	-	-	-	-	-	-	-	-	-	-	-	-
2022-02-24	89	X	X	m	1998-01-15	A	-	-	-	-	-	-	-	-	-	-	-	-
2022-03-07	123	X	X	m	1990-07-17	A	-	-	-	-	-	-	-	-	-	-	-	-
2022-03-14	145	X	X	f	2001-03-09	A	-	-	-	-	-	-	-	-	-	-	-	-
2022-03-24	189	X	X	f	Corrupted file	A	-	-	-	-	-	-	-	-	-	-	-	-
2022-03-24	190	X	X	f	Corrupted file	A	-	-	-	-	-	-	-	-	-	-	-	-
2022-03-25	197	X	X	testing	testing	A	-	-	-	-	-	-	-	-	-	-	-	-
2022-03-28	199	X	X	f	Corrupted file	A	-	-	-	-	-	-	-	-	-	-	-	-
2022-03-28	202	X	X	m		A	-	-	-	-	-	-	-	-	-	-	-	-
2022-03-31	230	X	X	f	1963-01-24	A	-	-	-	-	-	-	-	-	-	-	-	-
2022-03-31	232	X	X	f	1932-06-07	A	-	-	-	-	-	-	-	-	-	-	-	-
2022-04-11	266	X	X	m	2004-12-29	A	-	-	-	-	-	-	-	-	-	-	-	-
2022-04-12	279	X	X	f	1984-03-22	A	-	-	-	-	-	-	-	-	-	-	-	-
2022-04-12	281	X	X	f	1956-01-24	A	-	-	-	-	-	-	-	-	-	-	-	-
2022-01-31	22	X	X	f	1987-04-20	B	-	-	-	-	-	-	-	-	-	-	-	-
2022-02-21	79	X	X	m	10.11.0983	B	-	-	-	-	-	-	-	-	-	-	-	-
2022-02-28	93	X	X	f	1934-10-01	B	-	-	-	-	-	-	-	-	-	-	-	-
2022-03-01	96	X	X	f	1984-10-05	B	-	-	-	-	-	-	-	-	-	-	-	-
2022-03-01	99	X	X	f	1970-02-06	B	-	-	-	-	-	-	-	-	-	-	-	-
2022-03-03	109	X	X	f	1990-02-07	B	-	-	-	-	-	-	-	-	-	-	-	-
2022-03-08	125	X	X	f	1996-03-22	B	-	-	-	-	-	-	-	-	-	-	-	-
2022-03-08	135	X	X	f	1984-03-24	B	-	-	-	-	-	-	-	-	-	-	-	-
2022-03-14	142	X	X	f	1986-07-18	B	-	-	-	-	-	-	-	-	-	-	-	-
2022-03-16	164	X	X	f	1981-04-28	B	-	-	-	-	-	-	-	-	-	-	-	-
2022-03-17	167	X	X	f	1990-07-27	B	-	-	-	-	-	-	-	-	-	-	-	-
2022-03-21	180	X	X	f	1968-06-05	B	-	-	-	-	-	-	-	-	-	-	-	-
2022-03-22	183	X	X	m	1967-11-14	B	-	-	-	-	-	-	-	-	-	-	-	-
2022-03-23	187	X	X	f	1978-06-19	B	-	-	-	-	-	-	-	-	-	-	-	-
2022-03-25	196	X	X	m	1977-06-01	B	-	-	-	-	-	-	-	-	-	-	-	-
2022-03-28	203	X	X	f	1982-03-31	B	-	-	-	-	-	-	-	-	-	-	-	-
2022-03-28	208	X	X	m	1998-04-01	B	-	-	-	-	-	-	-	-	-	-	-	-
2022-03-29	215	X	X	f	1965-06-11	B	-	-	-	-	-	-	-	-	-	-	-	-
2022-03-29	220	X	X	m	1988-12-26	B	-	-	-	-	-	-	-	-	-	-	-	-
2022-03-30	223	X	X	m	1974-07-23	B	-	-	-	-	-	-	-	-	-	-	-	-
2022-04-04	241	X	X	m	1973-02-24	B	-	-	-	-	-	-	-	-	-	-	-	-
2022-04-07	258	X	X	f	1958-07-09	B	-	-	-	-	-	-	-	-	-	-	-	-
2022-04-08	262	X	X	m	1974-02-10	B	-	-	-	-	-	-	-	-	-	-	-	-
2022-04-11	273	X	X	f	1988-01-04	B	-	-	-	-	-	-	-	-	-	-	-	-
2022-04-11	274	X	X	f	1980-07-04	B	-	-	-	-	-	-	-	-	-	-	-	-
2022-04-13	287	X	X	m	2002-01-01	B	-	-	-	-	-	-	-	-	-	-	-	-
2022-04-13	288	X	X	f	1974-07-17	B	-	-	-	-	-	-	-	-	-	-	-	-
2022-04-19	295	X	X	f	1958-06-04	B	-	-	-	-	-	-	-	-	-	-	-	-
2022-04-19	298	X	X	f	1976-10-15	B	-	-	-	-	-	-	-	-	-	-	-	-
2022-04-21	307	X	X	f	1988-02-16	B	-	-	-	-	-	-	-	-	-	-	-	-
2022-04-22	316	X	X	m	1977-12-25	B	-	-	-	-	-	-	-	-	-	-	-	-
2022-04-11	265	X	X	m	1991-06-11	C	-	-	-	-	-	-	-	-	-	-	-	-
2022-02-16	62	X	X	m	1981-02-06	C	-	-	-	-	-	-	-	-	-	-	-	-
2022-02-18	69	X	X	f	1990-01-28	C	-	-	-	-	-	-	-	-	-	-	-	-
2022-02-21	70	X	X	m	2000-07-13	C	-	-	-	-	-	-	-	-	-	-	-	-
2022-02-22	82	X	X	f	1981-04-27	C	-	-	-	-	-	-	-	-	-	-	-	-
2022-03-02	105	X	X	f	1979-02-08	C	-	-	-	-	-	-	-	-	-	-	-	-
2022-03-07	117	X	X	f	1990-09-26	C	-	-	-	-	-	-	-	-	-	-	-	-
2022-03-14	143	X	X	f	1975-08-19	C	-	-	-	-	-	-	-	-	-	-	-	-
2022-03-14	148	X	X	m	1983-08-05	C	-	-	-	-	-	-	-	-	-	-	-	-
2022-03-15	157	X	X	f	1967-05-19	C	-	-	-	-	-	-	-	-	-	-	-	-
2022-03-15	160	X	X	m	1968-01-01	C	-	-	-	-	-	-	-	-	-	-	-	-
2022-03-24	188	X	X	f	1977-08-02	C	-	-	-	-	-	-	-	-	-	-	-	-
2022-03-28	205	X	X	m	1994-04-20	C	-	-	-	-	-	-	-	-	-	-	-	-
2022-03-28	206	X	X	m	1992-06-08	C	-	-	-	-	-	-	-	-	-	-	-	-
2022-04-05	246	X	X	f	1981-01-25	C	-	-	-	-	-	-	-	-	-	-	-	-
2022-04-22	309	X	X	m	1990-08-01	C	-	-	-	-	-	-	-	-	-	-	-	-
2022-04-12	277	X	X	m	1962-12-13	D	-	-	-	-	-	-	-	-	-	-	-	-
2022-03-14	149	X	X	f	1958-03-06	D	-	-	-	-	-	-	-	-	-	-	-	-
2022-03-17	166	X	X	f	1976-10-15	D	-	-	-	-	-	-	-	-	-	-	-	-
2022-03-18	169	X	X	m	1983-03-20	D	-	-	-	-	-	-	-	-	-	-	-	-
2022-04-01	233	X	X	f	1957-01-16	D	-	-	-	-	-	-	-	-	-	-	-	-
2022-03-15	154	X	X	m	1972-06-07	E	-	-	-	-	-	-	-	-	-	-	-	-
2022-02-07	5	X	X	m	2007-10-20	F	-	-	-	-	-	-	-	-	-	-	-	-
2022-02-22	85	X	X	f	2001-02-22	F	-	-	-	-	-	-	-	-	-	-	-	-
2022-03-21	172	X	X	f	2002-03-20	F	-	-	-	-	-	-	-	-	-	-	-	-
2022-02-04	8	X	X	f	2005-08-16	G	-	-	-	-	-	-	-	-	-	-	-	-
2022-02-09	34	X	X	m	2006-05-11	G	-	-	-	-	-	-	-	-	-	-	-	-
2022-02-14	54	X	X	m	2009-10-29	G	-	-	-	-	-	-	-	-	-	-	-	-
2022-02-15	56	X	X	m	2011-10-21	G	-	-	-	-	-	-	-	-	-	-	-	-
2022-02-17	65	X	X	f	2003-03-17	G	-	-	-	-	-	-	-	-	-	-	-	-
2022-02-18	66	X	X	m	2007-10-14	G	-	-	-	-	-	-	-	-	-	-	-	-
2022-02-24	90	X	X	m	2008-08-16	G	-	-	-	-	-	-	-	-	-	-	-	-
2022-03-01	102	X	X	m	2008-10-08	G	-	-	-	-	-	-	-	-	-	-	-	-
2022-03-08	133	X	X	m	2015-03-24	G	-	-	-	-	-	-	-	-	-	-	-	-
2022-03-08	136	X	X	m	2013-10-03	G	-	-	-	-	-	-	-	-	-	-	-	-
2022-03-17	165	X	X	f	2005-01-02	G	-	-	-	-	-	-	-	-	-	-	-	-
2022-03-22	185	X	X	m	2008-01-16	G	-	-	-	-	-	-	-	-	-	-	-	-
2022-03-23	186	X	X	f	2009-03-31	G	-	-	-	-	-	-	-	-	-	-	-	-
2022-03-28	200	X	X	f	2010-01-27	G	-	-	-	-	-	-	-	-	-	-	-	-
2022-03-28	210	X	X	m	2012-07-11	G	-	-	-	-	-	-	-	-	-	-	-	-
2022-04-05	247	X	X	f	2010-06-24	G	-	-	-	-	-	-	-	-	-	-	-	-
2022-04-08	260	X	X	f	2007-12-12	G	-	-	-	-	-	-	-	-	-	-	-	-
2022-04-11	272	X	X	f	2009-02-02	G	-	-	-	-	-	-	-	-	-	-	-	-
2022-04-11	275	X	X	f	2003-12-07	G	-	-	-	-	-	-	-	-	-	-	-	-
2022-04-12	282	X	X	m	2007-01-21	G	-	-	-	-	-	-	-	-	-	-	-	-
2022-04-15	293	X	X	f	2006-01-18	G	-	-	-	-	-	-	-	-	-	-	-	-
2022-04-20	300	X	X	f	2014-11-25	G	-	-	-	-	-	-	-	-	-	-	-	-
2022-04-22	314	X	X	f	2012-07-03	G	-	-	-	-	-	-	-	-	-	-	-	-
2022-04-08	261	X	X	f	1956-12-19	H	-	-	-	-	-	-	-	-	-	-	-	-
2022-02-25	91	X	X	f	1956-08-30	H	-	-	-	-	-	-	-	-	-	-	-	-
2022-02-07	1	X	X	m	1996-09-27	NO	-	-	-	-	-	-	-	-	-	-	-	-
2022-02-07	2	X	X	f	1989-08-20	NO	-	-	-	-	-	-	-	-	-	-	-	-
2022-02-07	3	X	X	f	1954-07-07	NO	-	-	-	-	-	-	-	-	-	-	-	-
2022-02-07	4	X	X	f	2010-04-02	NO	-	-	-	-	-	-	-	-	-	-	-	-
2022-02-07	6	X	X	f	1962-08-04	NO	-	-	-	-	-	-	-	-	-	-	-	-
2022-02-04	9	X	X	m	2002-01-01	NO	-	-	-	-	-	-	-	-	-	-	-	-
2022-02-01	14	X	X	f	1975-11-13	NO	-	-	-	-	-	-	-	-	-	-	-	-
2022-02-01	15	X	X	f	1974-06-16	NO	-	-	-	-	-	-	-	-	-	-	-	-
2022-01-31	16	X	X	m	1993-12-14	NO	-	-	-	-	-	-	-	-	-	-	-	-
2022-01-31	17	X	X	m	1994-10-03	NO	-	-	-	-	-	-	-	-	-	-	-	-
2022-01-31	24	X	X	m	1981-12-10	NO	-	-	-	-	-	-	-	-	-	-	-	-
2022-02-08	28	X	X	f	1975-03-10	NO	-	-	-	-	-	-	-	-	-	-	-	-
2022-02-10	38	X	X	f	1964-03-04	NO	-	-	-	-	-	-	-	-	-	-	-	-
2022-02-11	41	X	X	f	1995-10-04	NO	-	-	-	-	-	-	-	-	-	-	-	-
2022-02-14	44	X	X	m	1955-08-15	NO	-	-	-	-	-	-	-	-	-	-	-	-
2022-02-14	48	X	X	f	1984-08-19	NO	-	-	-	-	-	-	-	-	-	-	-	-
2022-02-14	50	X	X	m	1974-04-30	NO	-	-	-	-	-	-	-	-	-	-	-	-
2022-02-14	51	X	X	f	1995-04-13	NO	-	-	-	-	-	-	-	-	-	-	-	-
2022-02-14	53	X	X	f	1974-02-17	NO	-	-	-	-	-	-	-	-	-	-	-	-
2022-02-15	57	X	X	m	1959-04-29	NO	-	-	-	-	-	-	-	-	-	-	-	-
2022-02-15	58	X	X	f	1955-07-07	NO	-	-	-	-	-	-	-	-	-	-	-	-
2022-02-15	60	X	X	m	2002-01-01	NO	-	-	-	-	-	-	-	-	-	-	-	-
2022-02-16	61	X	X	m	2004-05-07	NO	-	-	-	-	-	-	-	-	-	-	-	-
2022-02-17	63	X	X	f	1998-08-01	NO	-	-	-	-	-	-	-	-	-	-	-	-
2022-02-18	67	X	X	f	1933-12-08	NO	-	-	-	-	-	-	-	-	-	-	-	-
2022-02-21	73	X	X	f	1998-09-28	NO	-	-	-	-	-	-	-	-	-	-	-	-
2022-02-21	74	X	X	f	1993-06-29	NO	-	-	-	-	-	-	-	-	-	-	-	-
2022-02-21	77	X	X	f	1964-08-08	NO	-	-	-	-	-	-	-	-	-	-	-	-
2022-02-21	78	X	X	m	1980-04-13	NO	-	-	-	-	-	-	-	-	-	-	-	-
2022-02-21	81	X	X	m	1995-12-30	NO	-	-	-	-	-	-	-	-	-	-	-	-
2022-02-22	83	X	X	f	2002-08-15	NO	-	-	-	-	-	-	-	-	-	-	-	-
2022-02-23	88	X	X	f	2000-04-16	NO	-	-	-	-	-	-	-	-	-	-	-	-
2022-02-28	94	X	X	m	1962-02-23	NO	-	-	-	-	-	-	-	-	-	-	-	-
2022-03-01	95	X	X	f	1959-08-20	NO	-	-	-	-	-	-	-	-	-	-	-	-
2022-03-01	104	X	X	m	1978-06-01	NO	-	-	-	-	-	-	-	-	-	-	-	-
2022-03-02	107	X	X	f	1957-10-05	NO	-	-	-	-	-	-	-	-	-	-	-	-
2022-03-02	108	X	X	f	1978-07-24	NO	-	-	-	-	-	-	-	-	-	-	-	-
2022-03-07	113	X	X	m	1945-01-19	NO	-	-	-	-	-	-	-	-	-	-	-	-
2022-03-07	114	X	X	m	1975-05-17	NO	-	-	-	-	-	-	-	-	-	-	-	-
2022-03-07	118	X	X	m	1955-11-07	NO	-	-	-	-	-	-	-	-	-	-	-	-
2022-03-07	119	X	X	f	1987-12-02	NO	-	-	-	-	-	-	-	-	-	-	-	-
2022-03-07	121	X	X	m	1975-10-14	NO	-	-	-	-	-	-	-	-	-	-	-	-
2022-03-07	124	X	X	m	1978-01-02	NO	-	-	-	-	-	-	-	-	-	-	-	-
2022-03-08	129	X	X	f	1970-10-06	NO	-	-	-	-	-	-	-	-	-	-	-	-
2022-03-08	131	X	X	f	1948-12-13	NO	-	-	-	-	-	-	-	-	-	-	-	-
2022-03-09	137	X	X	f	1967-11-27	NO	-	-	-	-	-	-	-	-	-	-	-	-
2022-03-09	140	X	X	f	1975-02-19	NO	-	-	-	-	-	-	-	-	-	-	-	-
2022-03-14	141	X	X	f	1956-04-26	NO	-	-	-	-	-	-	-	-	-	-	-	-
2022-03-15	150	X	X	f	1963-03-05	NO	-	-	-	-	-	-	-	-	-	-	-	-
2022-03-15	152	X	X	f	2003-11-06	NO	-	-	-	-	-	-	-	-	-	-	-	-
2022-03-15	159	X	X	f	2001-08-20	NO	-	-	-	-	-	-	-	-	-	-	-	-
2022-03-16	161	X	X	m	1946-04-08	NO	-	-	-	-	-	-	-	-	-	-	-	-
2022-03-16	163	X	X	m	1979-03-12	NO	-	-	-	-	-	-	-	-	-	-	-	-
2022-03-18	168	X	X	?	1985-09-16	NO	-	-	-	-	-	-	-	-	-	-	-	-
2022-03-21	175	X	X	f	1973-07-08	NO	-	-	-	-	-	-	-	-	-	-	-	-
2022-03-21	177	X	X	f	2001-05-19	NO	-	-	-	-	-	-	-	-	-	-	-	-
2022-03-21	178	X	X	f	1973-11-13	NO	-	-	-	-	-	-	-	-	-	-	-	-
2022-03-22	184	X	X	f	1975-08-19	NO	-	-	-	-	-	-	-	-	-	-	-	-
2022-03-24	191	X	X	f	1974-05-09	NO	-	-	-	-	-	-	-	-	-	-	-	-
2022-03-24	192	X	X	m	2002-01-01	NO	-	-	-	-	-	-	-	-	-	-	-	-
2022-03-24	194	X	X	f	1974-11-19	NO	-	-	-	-	-	-	-	-	-	-	-	-
2022-03-28	201	X	X	f	1963-11-21	NO	-	-	-	-	-	-	-	-	-	-	-	-
2022-03-28	207	X	X	f	1991-09-03	NO	-	-	-	-	-	-	-	-	-	-	-	-
2022-03-28	209	X	X	f	1995-03-12	NO	-	-	-	-	-	-	-	-	-	-	-	-
2022-03-29	212	X	X	m	1986-07-22	NO	-	-	-	-	-	-	-	-	-	-	-	-
2022-03-29	217	X	X	f	1994-02-04	NO	-	-	-	-	-	-	-	-	-	-	-	-
2022-03-29	218	X	X	m	1995-06-14	NO	-	-	-	-	-	-	-	-	-	-	-	-
2022-03-30	222	X	X	f	1973-10-01	NO	-	-	-	-	-	-	-	-	-	-	-	-
2022-03-30	225	X	X	m	1997-07-11	NO	-	-	-	-	-	-	-	-	-	-	-	-
2022-03-31	228	X	X	f	1992-05-19	NO	-	-	-	-	-	-	-	-	-	-	-	-
2022-03-31	229	X	X	f	1974-03-05	NO	-	-	-	-	-	-	-	-	-	-	-	-
2022-03-31	231	X	X	f	1934-11-19	NO	-	-	-	-	-	-	-	-	-	-	-	-
2022-04-01	234	X	X	m	1981-06-30	NO	-	-	-	-	-	-	-	-	-	-	-	-
2022-04-01	235	X	X	m	1992-11-19	NO	-	-	-	-	-	-	-	-	-	-	-	-
2022-04-04	237	X	X	m	1955-11-01	NO	-	-	-	-	-	-	-	-	-	-	-	-
2022-04-04	239	X	X	f	1979-10-08	NO	-	-	-	-	-	-	-	-	-	-	-	-
2022-04-04	240	X	X	f	1984-06-26	NO	-	-	-	-	-	-	-	-	-	-	-	-
2022-04-05	242	X	X	f	1971-05-28	NO	-	-	-	-	-	-	-	-	-	-	-	-
2022-04-06	251	X	X	f	1958-11-06	NO	-	-	-	-	-	-	-	-	-	-	-	-
2022-04-07	252	X	X	f	1966-04-16	NO	-	-	-	-	-	-	-	-	-	-	-	-
2022-04-07	253	X	X	f	1967-07-10	NO	-	-	-	-	-	-	-	-	-	-	-	-
2022-04-07	257	X	X	f	2001-03-14	NO	-	-	-	-	-	-	-	-	-	-	-	-
2022-04-11	264	X	X	m	1971-11-14	NO	-	-	-	-	-	-	-	-	-	-	-	-
2022-04-11	267	X	X	f	1992-01-21	NO	-	-	-	-	-	-	-	-	-	-	-	-
2022-04-11	268	X	X	m	1993-03-13	NO	-	-	-	-	-	-	-	-	-	-	-	-
2022-04-11	276	X	X	f	1951-05-19	NO	-	-	-	-	-	-	-	-	-	-	-	-
2022-04-12	280	X	X	m	1956-05-26	NO	-	-	-	-	-	-	-	-	-	-	-	-
2022-04-13	291	X	X	f	1996-03-22	NO	-	-	-	-	-	-	-	-	-	-	-	-
2022-04-15	292	X	X	f	1992-03-20	NO	-	-	-	-	-	-	-	-	-	-	-	-
2022-04-19	296	X	X	f	1962-06-06	NO	-	-	-	-	-	-	-	-	-	-	-	-
2022-04-21	302	X	X	m	1995-01-21	NO	-	-	-	-	-	-	-	-	-	-	-	-
2022-04-22	310	X	X	m	1981-05-07	NO	-	-	-	-	-	-	-	-	-	-	-	-
Single rooted
2022-02-17	64	X	X	f	1990-01-22	YES	1	1	-	-	-	-	-	-	-	-	-
2022-02-21	72	X	X	f	1992-04-13	YES	1	1	-	-	-	-	-	-	-	-	-
2022-02-28	92	X	X	f	1958-07-16	YES	1	1	-	-	-	-	-	-	-	-	YES
2022-03-01	100	X	X	f	1995-11-29	YES	1	2	2	-	-	-	-	-	-	-	-
2022-02-08	31	X	X	f	1993-02-24	YES	1	4	4	-	-	-	-	-	-	-	-
2022-02-01	12	X	X	m	1985-05-11	YES	1	4	4	-	-	-	-	-	-	-	-
2022-03-24	193	X	X	f	2001-02-22	YES	1	4	4	-	-	-	-	-	-	-	YES
2022-04-11	270	X	X	f	1976-11-08	YES	1	4	4	-	-	-	-	-	-	-	YES
2022-03-01	101	X	X	f	1983-05-20	YES	1	-	5	-	-	-	-	-	-	-	-
2022-02-08	27	X	X	f	2961-11-20	YES	1	8	8	8	-	-	-	-	-	-	YES
Double rooted
2022-02-01	10	X	X	f	1997-01-04	YES	2	1	1	-	-	-	-	-	-	-	-
2022-02-10	37	X	X	f	2004-09-06	YES	2	1	1	-	-	-	-	-	-	-	-
2022-02-10	40	X	X	f	1992-03-30	YES	2	1	1	-	-	-	-	-	-	-	-
2022-02-11	42	X	X	f	1996-11-12	YES	2	1	1	-	-	-	-	-	-	-	-
2022-02-14	45	X	X	f	1997-11-10	YES	2	1	1	-	-	-	-	-	-	-	-
2022-02-18	68	X	X	f	1998-04-03	YES	2	1	1	-	-	-	-	-	-	-	-
2022-02-21	75	X	X	f	1987-06-08	YES	2	1	1	-	-	-	-	-	-	-	-
2022-02-21	76	X	X	f	1999-10-14	YES	2	1	1	-	-	-	-	-	-	-	-
2022-03-01	103	X	X	f	1994-06-21	YES	2	1	1	-	-	-	-	-	-	-	-
2022-03-04	111	X	X	f	1992-11-25	YES	2	1	1	-	-	-	-	-	-	-	-
2022-03-08	127	X	X	f	1993-09-09	YES	2	1	1	-	-	-	-	-	-	-	-
2022-03-08	128	X	X	f	1992-02-27	YES	2	1	1	-	-	-	-	-	-	-	-
2022-03-08	130	X	X	f	1998-05-13	YES	2	1	1	-	-	-	-	-	-	-	-
2022-03-08	134	X	X	f	1998-03-19	YES	2	1	1	-	-	-	-	-	-	-	-
2022-03-14	144	X	X	f	1973-10-21	YES	2	1	1	-	-	-	-	-	-	-	-
2022-03-21	170	X	X	f	1999-12-31	YES	2	1	1	-	-	-	-	-	-	-	-
2022-03-21	171	X	X	f	1996-11-29	YES	2	1	1	-	-	-	-	-	-	-	-
2022-03-21	176	X	X	f	1998-02-22	YES	2	1	1	-	-	-	-	-	-	-	-
2022-03-22	181	X	X	f	1997-05-08	YES	2	1	1	-	-	-	-	-	-	-	-
2022-03-25	195	X	X	f	1979-04-11	YES	2	1	1	-	-	-	-	-	-	-	-
2022-03-28	211	X	X	f	1999-12-31	YES	2	1	1	-	-	-	-	-	-	-	-
2022-03-29	219	X	X	f	1976-12-07	YES	2	1	1	-	-	-	-	-	-	-	-
2022-03-29	221	X	X	f	1996-02-13	YES	2	1	1	-	-	-	-	-	-	-	-
2022-03-30	227	X	X	f	1966-03-14	YES	2	1	1	-	-	-	-	-	-	-	-
2022-04-01	236	X	X	f	1967-01-07	YES	2	1	1	-	-	-	-	-	-	-	-
2022-04-05	248	X	X	f	1988-08-11	YES	2	1	1	-	-	-	-	-	-	-	-
2022-04-07	255	X	X	f	1989-12-16	YES	2	1	1	-	-	-	-	-	-	-	-
2022-04-08	263	X	X	f	1990-06-29	YES	2	1	1	-	-	-	-	-	-	-	-
2022-04-19	294	X	X	f	1994-01-07	YES	2	1	1	-	-	-	-	-	-	-	-
2022-04-21	303	X	X	f	2000-04-14	YES	2	1	1	-	-	-	-	-	-	-	-
2022-04-22	312	X	X	f	2002-08-11	YES	2	1	1	-	-	-	-	-	-	-	-
2022-04-22	313	X	X	f	1982-12-31	YES	2	1	1	-	-	-	-	-	-	-	-
2022-04-22	315	X	X	f	1999-11-29	YES	2	1	1	-	-	-	-	-	-	-	-
2022-03-15	153	X	X	m	1996-05-28	YES	2	1	1	-	-	-	-	-	-	-	-
2022-01-31	25	X	X	m	1985-05-16	YES	2	1	1	-	-	-	-	-	-	-	-
2022-02-09	33	X	X	m	1996-02-12	YES	2	1	1	-	-	-	-	-	-	-	-
2022-02-09	35	X	X	m	2000-06-01	YES	2	1	1	-	-	-	-	-	-	-	-
2022-02-10	36	X	X	m	2000-07-03	YES	2	1	1	-	-	-	-	-	-	-	-
2022-02-14	49	X	X	m	1997-03-03	YES	2	1	1	-	-	-	-	-	-	-	-
2022-02-22	84	X	X	m	1983-02-05	YES	2	1	1	-	-	-	-	-	-	-	-
2022-03-01	98	X	X	m	1995-12-16	YES	2	1	1	-	-	-	-	-	-	-	-
2022-03-04	110	X	X	m	1996-01-18	YES	2	1	1	-	-	-	-	-	-	-	-
2022-03-07	116	X	X	m	1985-07-07	YES	2	1	1	-	-	-	-	-	-	-	-
2022-03-14	146	X	X	m	2000-01-04	YES	2	1	1	-	-	-	-	-	-	-	-
2022-03-15	158	X	X	m	1996-05-27	YES	2	1	1	-	-	-	-	-	-	-	-
2022-03-25	198	X	X	m	1998-01-15	YES	2	1	1	-	-	-	-	-	-	-	-
2022-03-28	204	X	X	m	1981-03-04	YES	2	1	1	-	-	-	-	-	-	-	-
2022-03-29	216	X	X	m	1993-02-24	YES	2	1	1	-	-	-	-	-	-	-	-
2022-04-05	244	X	X	m	1969-06-17	YES	2	1	1	-	-	-	-	-	-	-	-
2022-04-05	245	X	X	m	1991-06-04	YES	2	1	1	-	-	-	-	-	-	-	-
2022-04-12	285	X	X	m	1986-11-05	YES	2	1	1	-	-	-	-	-	-	-	-
2022-04-13	286	X	X	m	1989-02-02	YES	2	1	1	-	-	-	-	-	-	-	-
2022-04-13	289	X	X	m	1999-02-21	YES	2	1	1	-	-	-	-	-	-	-	-
2022-04-19	297	X	X	m	1994-03-26	YES	2	1	1	-	-	-	-	-	-	-	-
2022-04-20	299	X	X	m	1951-05-26	YES	2	1	1	-	-	-	-	-	-	-	-
2022-04-21	305	X	X	m	1993-08-17	YES	2	1	1	-	-	-	-	-	-	-	-
2022-02-14	47	X	X	f	1998-02-20	YES	2	1	1	-	-	-	-	-	-	-	YES
2022-02-15	59	X	X	m	1991-07-17	YES	2	1	1	-	-	-	-	-	-	-	-	YES
2022-03-07	115	X	X	f	1992-03-29	YES	2	1	-	-	-	-	4	4	-	-	-
2022-01-31	20	X	X	m	1994-05-19	YES	2	1	-	-	-	-	4	4	-	-	-
2022-04-22	311	X	X	m	1994-01-10	YES	2	1	-	-	-	-	4	4	-	-	-
2022-02-08	30	X	X	f	1996-11-12	YES	2	3	1	-	-	-	-	-	-	-	-
2022-04-21	304	X	X	m	1978-04-06	YES	2	3	1	-	-	-	-	-	-	-	-
2022-03-01	97	X	X	f	1981-10-29	YES	2	5	1	-	-	-	-	-	-	-	-	YES
2022-04-12	278	X	X	f	2000-04-08	YES	2	5	1	-	-	-	-	-	-	-	-
2022-02-14	46	X	X	f	1998-02-20	YES	2	-	1	2	2	-	-	-	-	-	-
2022-02-22	86	X	X	f	1980-04-21	YES	2	-	1	2	2	-	-	-	-	-	-
2022-04-12	284	X	X	f	1986-10-28	YES	2	-	1	2	2	-	-	-	-	-	-
2022-03-07	120	X	X	m	1992-03-05	YES	2	-	1	2	2	-	-	-	-	-	-
2022-03-07	122	X	X	m	1987-02-26	YES	2	-	1	2	2	-	-	-	-	-	-
2022-01-31	21	X	X	m	1966-08-07	YES	2	-	1	2	2	-	-	-	-	-	-
2022-03-29	213	X	X	f	1996-07-14	YES	2	-	1	2	2	-	-	-	-	-	YES
2022-03-16	162	X	X	f	27.07.1084	YES	2	-	1	4	4	-	-	-	-	-	-
2022-02-08	32	X	X	f	1999-02-17	YES	2	-	1	4	4	-	-	-	-	-	-
2022-02-11	43	X	X	f	1994-05-30	YES	2	-	1	4	4	-	-	-	-	-	-
2022-03-14	147	X	X	f	1987-08-24	YES	2	-	1	4	4	-	-	-	-	-	-
2022-03-15	155	X	X	f	1984-04-12	YES	2	-	1	4	4	-	-	-	-	-	-
2022-03-21	173	X	X	f	1996-09-18	YES	2	-	1	4	4	-	-	-	-	-	-
2022-03-29	214	X	X	f	1992-12-17	YES	2	-	1	4	4	-	-	-	-	-	-
2022-04-06	250	X	X	f	2002-08-16	YES	2	-	1	4	4	-	-	-	-	-	-
2022-04-07	256	X	X	f	1996-02-03	YES	2	-	1	4	4	-	-	-	-	-	-
2022-04-12	283	X	X	f	1977-03-24	YES	2	-	1	4	4	-	-	-	-	-	-
2022-04-22	308	X	X	f	1990-10-05	YES	2	-	1	4	4	-	-	-	-	-	-
2022-01-31	23	X	X	m	1981-05-16	YES	2	-	1	4	4	-	-	-	-	-	-
2022-02-21	71	X	X	m	1986-09-25	YES	2	-	1	4	4	-	-	-	-	-	-
2022-02-23	87	X	X	m	1954-09-21	YES	2	-	1	4	4	-	-	-	-	-	-
2022-03-02	106	X	X	m	1992-07-23	YES	2	-	1	4	4	-	-	-	-	-	-
2022-03-08	126	X	X	m	1996-03-22	YES	2	-	1	4	4	-	-	-	-	-	-
2022-03-15	151	X	X	m	1983-12-30	YES	2	-	1	4	4	-	-	-	-	-	-
2022-03-15	156	X	X	m	1972-10-06	YES	2	-	1	4	4	-	-	-	-	-	-
2022-03-21	174	X	X	m	1978-08-21	YES	2	-	1	4	4	-	-	-	-	-	-
2022-03-21	179	X	X	m	1968-06-05	YES	2	-	1	4	4	-	-	-	-	-	-
2022-03-30	226	X	X	m	1971-02-24	YES	2	-	1	4	4	-	-	-	-	-	-
2022-04-07	254	X	X	m	1975-11-30	YES	2	-	1	4	4	-	-	-	-	-	-
2022-04-11	271	X	X	m	1956-10-06	YES	2	-	1	4	4	-	-	-	-	-	-
2022-04-13	290	X	X	m	1992-04-26	YES	2	-	1	4	4	-	-	-	-	-	-
2022-04-20	301	X	X	m	1988-04-15	YES	2	-	1	4	4	-	-	-	-	-	-
2022-04-05	243	X	X	m	1999-12-02	YES	2	-	1	4	4	-	-	-	-	-	-
2022-03-22	182	X	X	f	1996-07-17	YES	2	-	1	4	4	-	-	-	-	-	YES
Three rooted
2022-01-31	19	X	X	f	1990-10-27	YES	3	1	-	-	-	-	1	1	-	-	-
2022-04-11	269	X	X	m	1997-08-05	YES	3	1	-	-	-	-	1	1	-	-	-
2022-02-04	7	X	X	f	1997-05-22	YES	3	1	-	-	-	-	1	5	-	-	-
2022-02-08	26	X	X	f	1961-11-20	YES	3	-	1	1	1	-	-	-	-	-	-
2022-02-10	39	X	X	f	1993-02-04	YES	3	-	1	1	1	-	-	-	-	-	-
2022-02-15	55	X	X	f	1998-03-23	YES	3	-	1	1	1	-	-	-	-	-	-
2022-03-04	112	X	X	f	1975-04-27	YES	3	-	1	1	1	-	-	-	-	-	-
2022-03-09	139	X	X	f	1998-08-31	YES	3	-	1	1	1	-	-	-	-	-	-
2022-03-30	224	X	X	f	1999-05-07	YES	3	-	1	1	1	-	-	-	-	-	-
2022-04-21	306	X	X	f	1993-02-28	YES	3	-	1	1	1	-	-	-	-	-	-
2022-04-08	259	X	X	f	1977-05-27	YES	3	-	1	1	1	-	-	-	-	-	-
2022-02-01	11	X	X	m	1990-08-27	YES	3	-	1	1	1	-	-	-	-	-	-
2022-03-08	132	X	X	m	1983-08-18	YES	3	-	1	1	1	-	-	-	-	-	-
2022-03-09	138	X	X	m	1998-11-10	YES	3	-	1	1	1	-	-	-	-	-	-
2022-04-04	238	X	X	m	1952-02-08	YES	3	-	1	1	1	-	-	-	-	-	-
2022-04-06	249	X	X	m	1992-01-24	YES	3	-	1	1	1	-	-	-	-	-	-
2022-02-14	52	X	X	f	1996-06-27	YES	3	-	-	4	4	-	1	1	-	-	-
Legend:
YES - tooth is present and to evaluate				YES		126
NO - tooth absent				NO		92
A technical problem, impossible to read the file				A		17
B - image did not cover the tooth				B		31
C - image did not cover the apices				C		16
D - caries				D		5
E - filling				E		1
F - open apex				F		3
G - Under 18 y.o.				G		23
H - tooth after endodontic treatment				H		2
I - under the prosthetic crown				I		0
J - only root present				J		0
K - after endodontic treatment and with prosthetic crown				K		0
L - after endodontic treatment with a filling				L		0
				SUM		316
			Amount	frequency	female	frequency	male	frequency
		1 rooted	10	0.0793651	9	0.9	1	0.1
		2 rooted	99	0.785714	54	0.545455	45	0.454545
		3 rooted	17	0.134921	11	0.647059	6	0.352941
		Sum	126	1	74	0.587302	52	0.412698
				Amount	female	frequency	male	frequency
	1 rooted Vertucci Type 1			3	3	1	0	0
	1 rooted Vertucci Type 2			1	1	1	0	0
	1 rooted Vertucci Type 4			4	3	0.75	1	0.25
	1 rooted Vertucci Type 5			1	1	1	0	0
	1 rooted Vertucci Type 8			1	1	1	0	0
	SUM:			10	9	0.9	1	0.1
				Amount	female	frequency	male	frequency
2 rooted Vertucci Type 1 in M & D root				58	34	0.586207	24	0.413793
(Fused 2 rooted Vertucci Type 1 in M & D root)				1	0	0	1	1
2 rooted Vertucci Type 1 in M root & Type 4 in D root				3	1	0.333333	2	0.666667
2 rooted Vertucci Type 3 in M root & Type 1 in D root				2	1	0.5	1	0.5
2 rooted Vertucci Type 5 in M root & Type 1 in D root				2	2	1	0	0
(Fused 2 rooted Vertucci Type 5 in M & Type 1 D root)				1	1	1	0	0
2 rooted Vertucci Type 2 in M root & Type 1 in D root				7	4	0.571429	3	0.428571
2 rooted Vertucci Type 4 in M root & Type 1 in D root				27	12	0.444444	15	0.555556
SUM:				99	54	0.545455	45	0.454545
				Amount	female	frequency	male	frequency
3 rooted Vertucci Type 1 in M, DB & DL root				2	1	0.5	1	0.5
3 rooted Vertucci Type 1 in M &DB root & Type 5 in DL root				1	1	1	0	0
3 rooted Vertucci Type 4 in M, and Type 1 DB & DL root				1	1	1	0	0
3 rooted Vertucci Type 1 in MB, ML & D root				13	8	0.615385	5	0.384615
SUM				17	11	0.647059	6	0.352941
C-shaped canal	Amount	Female	Frequency	Male	Frequency
1 rooted	4	4	1	0	0
2 rooted	3	3	1	0	0
SUM	7	7	1	0	0
Date of the examination	Number	Surname	Name	Sex	Date of birth	Tooth 48	Number of roots	Mesial canal (M) Vertucci type	Distal canal (D) Vertucci type	Mesiobuccal canal (MB) Vertucci type	Mesiolingual canal (ML) Vertucci type	Middle mesial canal (MM) Vertucci type	Distobuccal canal (DB) Vertucci type	Distolingual canal (DL) Vertucci type	Buccal canal (B) Vertucci type	Additioncal canal 1 Vertucci type	Type C canal	Fused roots
2022-02-01	13	X	X	m	2021-12-02	A	-	-	-	-	-	-	-	-	-	-	-
2022-01-31	18	X	X	m	1995-06-15	A	-	-	-	-	-	-	-	-	-	-	-
2022-02-08	29	X	X	f	1969-03-30	A	-	-	-	-	-	-	-	-	-	-	-
2022-02-21	80	X	X	f	1988-01-13	A	-	-	-	-	-	-	-	-	-	-	-
2022-02-24	89	X	X	m	1998-01-15	A	-	-	-	-	-	-	-	-	-	-	-
2022-03-07	123	X	X	m	1990-07-17	A
2022-03-14	145	X	X	f	2001-03-09	A
2022-03-24	189	X	X	f	corrupted file	A
2022-03-24	190	X	X	f	corrupted file	A
2022-03-25	197	X	X	testing		A
2022-03-28	199	X	X	f	corrupted file	A
2022-03-28	202	X	X	m		A
2022-03-31	230	X	X	f	1963-01-24	A
2022-03-31	232	X	X	f	1932-06-07	A
2022-04-11	266	X	X	m	2004-12-29	A	-	-	-	-	-	-	-	-	-	-	-
2022-04-12	279	X	X	f	1984-03-22	A
2022-04-12	281	X	X	f	1956-01-24	A
2022-01-31	22	X	X	f	1987-04-20	B	-	-	-	-	-	-	-	-	-	-	-
2022-02-21	79	X	X	m	10.11.0983	B	-	-	-	-	-	-	-	-	-	-	-
2022-02-28	93	X	X	f	1934-10-01	B	-	-	-	-	-	-	-	-	-	-	-
2022-03-01	96	X	X	f	1984-10-05	B	-	-	-	-	-	-	-	-	-	-	-
2022-03-01	99	X	X	f	1970-02-06	B	-	-	-	-	-	-	-	-	-	-	-
2022-03-03	109	X	X	f	1990-02-07	B	-	-	-	-	-	-	-	-	-	-	-
2022-03-08	125	X	X	f	1996-03-22	B	-	-	-	-	-	-	-	-	-	-	-
2022-03-08	129	X	X	f	1970-10-06	B	-	-	-	-	-	-	-	-	-	-	-
2022-03-08	135	X	X	f	1984-03-24	B	-	-	-	-	-	-	-	-	-	-	-
2022-03-14	142	X	X	f	1986-07-18	B	-	-	-	-	-	-	-	-	-	-	-
2022-03-14	144	X	X	f	1973-10-21	B	-	-	-	-	-	-	-	-	-	-	-
2022-03-14	148	X	X	m	1983-08-05	B	-	-	-	-	-	-	-	-	-	-	-
2022-03-15	156	X	X	m	1972-10-06	B	-	-	-	-	-	-	-	-	-	-	-
2022-03-15	160	X	X	m	1968-01-01	B	-	-	-	-	-	-	-	-	-	-	-
2022-03-17	167	X	X	f	1990-07-27	B	-	-	-	-	-	-	-	-	-	-	-
2022-03-18	169	X	X	m	1983-03-20	B	-	-	-	-	-	-	-	-	-	-	-
2022-03-21	170	X	X	f	1999-12-31	B	-	-	-	-	-	-	-	-	-	-	-
2022-03-22	183	X	X	m	1967-11-14	B	-	-	-	-	-	-	-	-	-	-	-
2022-03-23	187	X	X	f	1978-06-19	B	-	-	-	-	-	-	-	-	-	-	-
2022-03-28	203	X	X	f	1982-03-31	B	-	-	-	-	-	-	-	-	-	-	-
2022-03-28	204	X	X	m	1981-03-04	B	-	-	-	-	-	-	-	-	-	-	-
2022-03-28	206	X	X	m	1992-06-08	B	-	-	-	-	-	-	-	-	-	-	-
2022-03-28	211	X	X	f	1999-12-31	B	-	-	-	-	-	-	-	-	-	-	-
2022-04-05	246	X	X	f	1981-01-25	B	-	-	-	-	-	-	-	-	-	-	-
2022-04-07	256	X	X	f	1996-02-03	B	-	-	-	-	-	-	-	-	-	-	-
2022-04-07	258	X	X	f	1958-07-09	B	-	-	-	-	-	-	-	-	-	-	-
2022-04-11	265	X	X	m	1991-06-11	B	-	-	-	-	-	-	-	-	-	-	-
2022-04-11	274	X	X	f	1980-07-04	B	-	-	-	-	-	-	-	-	-	-	-
2022-04-12	284	X	X	f	1986-10-28	B	-	-	-	-	-	-	-	-	-	-	-
2022-04-13	287	X	X	m	2002-01-01	B	-	-	-	-	-	-	-	-	-	-	-
2022-04-13	288	X	X	f	1974-07-17	B	-	-	-	-	-	-	-	-	-	-	-
2022-04-19	294	X	X	f	1994-01-07	B	-	-	-	-	-	-	-	-	-	-	-
2022-04-19	298	X	X	f	1976-10-15	B	-	-	-	-	-	-	-	-	-	-	-
2022-04-21	307	X	X	f	1988-02-16	B	-	-	-	-	-	-	-	-	-	-	-
2022-04-22	312	X	X	f	2002-08-11	B	-	-	-	-	-	-	-	-	-	-	-
2022-02-16	62	X	X	m	1981-02-06	C	-	-	-	-	-	-	-	-	-	-	-
2022-02-18	69	X	X	f	1990-01-28	C	-	-	-	-	-	-	-	-	-	-	-
2022-02-22	82	X	X	f	1981-04-27	C	-	-	-	-	-	-	-	-	-	-	-
2022-03-02	105	X	X	f	1979-02-08	C	-	-	-	-	-	-	-	-	-	-	-
2022-03-14	143	X	X	f	1975-08-19	C	-	-	-	-	-	-	-	-	-	-	-
2022-03-16	163	X	X	m	1979-03-12	C	-	-	-	-	-	-	-	-	-	-	-
2022-03-24	188	X	X	f	1977-08-02	C	-	-	-	-	-	-	-	-	-	-	-
2022-03-25	196	X	X	m	1977-06-01	C	-	-	-	-	-	-	-	-	-	-	-
2022-03-28	208	X	X	m	1998-04-01	C	-	-	-	-	-	-	-	-	-	-	-
2022-03-29	215	X	X	f	1965-06-11	C	-	-	-	-	-	-	-	-	-	-	-
2022-03-29	220	X	X	m	1988-12-26	C	-	-	-	-	-	-	-	-	-	-	-
2022-04-11	273	X	X	f	1988-01-04	C	-	-	-	-	-	-	-	-	-	-	-
2022-04-22	309	X	X	m	1990-08-01	C	-	-	-	-	-	-	-	-	-	-	-
2022-03-14	147	X	X	f	1987-08-24	D	-	-	-	-	-	-	-	-	-	-	-
2022-03-15	154	X	X	m	1972-06-07	E	-	-	-	-	-	-	-	-	-	-	-
2022-03-21	172	X	X	f	2002-03-20	F		-	-	-	-	-	-	-	-	-	-
2022-02-07	5	X	X	m	2007-10-20	F	-	-	-	-	-	-	-	-	-	-	-
2022-03-21	177	X	X	f	2001-05-19	F	-	-	-	-	-	-	-	-	-	-	-
2022-02-04	8	X	X	f	2005-08-16	G	-	-	-	-	-	-	-	-	-	-	-
2022-02-09	34	X	X	m	2006-05-11	G	-	-	-	-	-	-	-	-	-	-	-
2022-02-14	54	X	X	m	2009-10-29	G	-	-	-	-	-	-	-	-	-	-	-
2022-02-15	56	X	X	m	2011-10-21	G	-	-	-	-	-	-	-	-	-	-	-
2022-02-17	65	X	X	f	2003-03-17	G	-	-	-	-	-	-	-	-	-	-	-
2022-02-18	66	X	X	m	2007-10-14	G	-	-	-	-	-	-	-	-	-	-	-
2022-02-24	90	X	X	m	2008-08-16	G	-	-	-	-	-	-	-	-	-	-	-
2022-03-01	102	X	X	m	2008-10-08	G	-	-	-	-	-	-	-	-	-	-	-
2022-03-08	133	X	X	m	2015-03-24	G	-	-	-	-	-	-	-	-	-	-	-
2022-03-08	136	X	X	m	2013-10-03	G
2022-03-17	165	X	X	f	2005-01-02	G	-	-	-	-	-	-	-	-	-	-	-
2022-03-22	185	X	X	m	2008-01-16	G	-	-	-	-	-	-	-	-	-	-	-
2022-03-23	186	X	X	f	2009-03-31	G	-	-	-	-	-	-	-	-	-	-	-
2022-03-28	200	X	X	f	2010-01-27	G
2022-03-28	210	X	X	m	2012-07-11	G	-	-	-	-	-	-	-	-	-	-	-
2022-04-05	247	X	X	f	2010-06-24	G
2022-04-08	260	X	X	f	2007-12-12	G	-	-	-	-	-	-	-	-	-	-	-
2022-04-11	272	X	X	f	2009-02-02	G	-	-	-	-	-	-	-	-	-	-	-
2022-04-11	275	X	X	f	2003-12-07	G	-	-	-	-	-	-	-	-	-	-	-
2022-04-12	282	X	X	m	2007-01-21	G
2022-04-15	293	X	X	f	2006-01-18	G	-	-	-	-	-	-	-	-	-	-	-
2022-04-20	300	X	X	f	2014-11-25	G	-	-	-	-	-	-	-	-	-	-	-
2022-04-22	314	X	X	f	2012-07-03	G
2022-01-31	21	X	X	m	1966-08-07	H	2	-	1	1	1	-	-	-		-	-
2022-03-01	104	X	X	m	1978-06-01	H	-	-	-	-	-	-	-	-	-	-	-
2022-03-15	155	X	X	f	1984-04-12	H	-	-	-	-	-	-	-	-	-	-	-
2022-03-29	219	X	X	f	1976-12-07	H	-	-	-	-	-	-	-	-	-	-	-
2022-04-05	244	X	X	m	1969-06-17	H	-	-	-	-	-	-	-	-	-	-	-
2022-04-11	271	X	X	m	1956-10-06	H	-	-	-	-	-	-	-	-	-	-	-
2022-03-09	140	X	X	f	1975-02-19	L	-	-	-	-	-	-	-	-	-	-	-
2022-02-07	2	X	X	f	1989-08-20	NO	-	-	-	-	-	-	-	-	-	-	-
2022-02-07	3	X	X	f	1954-07-07	NO	-	-	-	-	-	-	-	-	-	-	-
2022-02-07	4	X	X	f	2010-04-02	NO	-	-	-	-	-	-	-	-	-	-	-
2022-02-07	6	X	X	f	1962-08-04	NO	-	-	-	-	-	-	-	-	-	-	-
2022-02-04	9	X	X	m	2002-01-01	NO	-	-	-	-	-	-	-	-	-	-	-
2022-02-01	12	X	X	m	1985-05-11	NO	-	-	-	-	-	-	-	-	-	-	-
2022-02-01	15	X	X	f	1974-06-16	NO	-	-	-	-	-	-	-	-	-	-	-
2022-01-31	24	X	X	m	1981-12-10	NO	-	-	-	-	-	-	-	-	-	-	-
2022-02-08	28	X	X	f	1975-03-10	NO	-	-	-	-	-	-	-	-	-	-	-
2022-02-09	33	X	X	m	1996-02-12	NO	-	-	-	-	-	-	-	-	-	-	-
2022-02-10	38	X	X	f	1964-03-04	NO	-	-	-	-	-	-	-	-	-	-	-
2022-02-11	41	X	X	f	1995-10-04	NO	-	-	-	-	-	-	-	-	-	-	-
2022-02-14	44	X	X	m	1955-08-15	NO	-	-	-	-	-	-	-	-	-	-	-
2022-02-14	49	X	X	m	1997-03-03	NO	-	-	-	-	-	-	-	-	-	-	-
2022-02-14	53	X	X	f	1974-02-17	NO	-	-	-	-	-	-	-	-	-	-	-
2022-02-15	55	X	X	f	1998-03-23	NO	-	-	-	-	-	-	-	-	-	-	-
2022-02-15	57	X	X	m	1959-04-29	NO	-	-	-	-	-	-	-	-	-	-	-
2022-02-15	58	X	X	f	1955-07-07	NO	-	-	-	-	-	-	-	-	-	-	-
2022-02-15	59	X	X	m	1991-07-17	NO	-	-	-	-	-	-	-	-	-	-	-
2022-02-15	60	X	X	m	2002-01-01	NO	-	-	-	-	-	-	-	-	-	-	-
2022-02-16	61	X	X	m	2004-05-07	NO	-	-	-	-	-	-	-	-	-	-	-
2022-02-17	63	X	X	f	1998-08-01	NO	-	-	-	-	-	-	-	-	-	-	-
2022-02-18	67	X	X	f	1933-12-08	NO	-	-	-	-	-	-	-	-	-	-	-
2022-02-21	74	X	X	f	1993-06-29	NO	-	-	-	-	-	-	-	-	-	-	-
2022-02-21	77	X	X	f	1964-08-08	NO	-	-	-	-	-	-	-	-	-	-	-
2022-02-21	78	X	X	m	1980-04-13	NO	-	-	-	-	-	-	-	-	-	-	-
2022-02-22	83	X	X	f	2002-08-15	NO	-	-	-	-	-	-	-	-	-	-	-
2022-02-28	92	X	X	f	1958-07-16	NO	-	-	-	-	-	-	-	-	-	-	-
2022-02-28	94	X	X	m	1962-02-23	NO	-	-	-	-	-	-	-	-	-	-	-
2022-03-02	106	X	X	m	1992-07-23	NO	-	-	-	-	-	-	-	-	-	-	-
2022-03-02	107	X	X	f	1957-10-05	NO	-	-	-	-	-	-	-	-	-	-	-
2022-03-07	113	X	X	m	1945-01-19	NO	-	-	-	-	-	-	-	-	-	-	-
2022-03-07	114	X	X	m	1975-05-17	NO	-	-	-	-	-	-	-	-	-	-	-
2022-03-07	117	X	X	f	1990-09-26	NO	-	-	-	-	-	-	-	-	-	-	-
2022-03-07	118	X	X	m	1955-11-07	NO	-	-	-	-	-	-	-	-	-	-	-
2022-03-07	119	X	X	f	1987-12-02	NO	-	-	-	-	-	-	-	-	-	-	-
2022-03-07	121	X	X	m	1975-10-14	NO	-	-	-	-	-	-	-	-	-	-	-
2022-03-07	124	X	X	m	1978-01-02	NO	-	-	-	-	-	-	-	-	-	-	-
2022-03-08	131	X	X	f	1948-12-13	NO	-	-	-	-	-	-	-	-	-	-	-
2022-03-09	137	X	X	f	1967-11-27	NO	-	-	-	-	-	-	-	-	-	-	-
2022-03-14	141	X	X	f	1956-04-26	NO	-	-	-	-	-	-	-	-	-	-	-
2022-03-14	149	X	X	f	1958-03-06	NO	-	-	-	-	-	-	-	-	-	-	-
2022-03-15	152	X	X	f	2003-11-06	NO	-	-	-	-	-	-	-	-	-	-	-
2022-03-15	157	X	X	f	1967-05-19	NO	-	-	-	-	-	-	-	-	-	-	-
2022-03-15	159	X	X	f	2001-08-20	NO	-	-	-	-	-	-	-	-	-	-	-
2022-03-16	161	X	X	m	1946-04-08	NO	-	-	-	-	-	-	-	-	-	-	-
2022-03-18	168	X	X	?	1985-09-16	NO	-	-	-	-	-	-	-	-	-	-	-
2022-03-21	175	X	X	f	1973-07-08	NO	-	-	-	-	-	-	-	-	-	-	-
2022-03-21	178	X	X	f	1973-11-13	NO	-	-	-	-	-	-	-	-	-	-	-
2022-03-22	181	X	X	f	1997-05-08	NO	-	-	-	-	-	-	-	-	-	-	-
2022-03-22	184	X	X	f	1975-08-19	NO	-	-	-	-	-	-	-	-	-	-	-
2022-03-24	192	X	X	m	2002-01-01	NO	-	-	-	-	-	-	-	-	-	-	-
2022-03-24	194	X	X	f	1974-11-19	NO	-	-	-	-	-	-	-	-	-	-	-
2022-03-28	201	X	X	f	1963-11-21	NO	-	-	-	-	-	-	-	-	-	-	-
2022-03-28	209	X	X	f	1995-03-12	NO	-	-	-	-	-	-	-	-	-	-	-
2022-03-29	213	X	X	f	1996-07-14	NO	-	-	-	-	-	-	-	-	-	-	-
2022-03-29	216	X	X	m	1993-02-24	NO	-	-	-	-	-	-	-	-	-	-	-
2022-03-29	217	X	X	f	1994-02-04	NO	-	-	-	-	-	-	-	-	-	-	-
2022-03-29	218	X	X	m	1995-06-14	NO	-	-	-	-	-	-	-	-	-	-	-
2022-03-30	222	X	X	f	1973-10-01	NO	-	-	-	-	-	-	-	-	-	-	-
2022-03-30	226	X	X	m	1971-02-24	NO	-	-	-	-	-	-	-	-	-	-	-
2022-03-31	228	X	X	f	1992-05-19	NO	-	-	-	-	-	-	-	-	-	-	-
2022-03-31	229	X	X	f	1974-03-05	NO	-	-	-	-	-	-	-	-	-	-	-
2022-03-31	231	X	X	f	1934-11-19	NO	-	-	-	-	-	-	-	-	-	-	-
2022-04-01	233	X	X	f	1957-01-16	NO	-	-	-	-	-	-	-	-	-	-	-
2022-04-04	237	X	X	m	1955-11-01	NO	-	-	-	-	-	-	-	-	-	-	-
2022-04-04	239	X	X	f	1979-10-08	NO	-	-	-	-	-	-	-	-	-	-	-
2022-04-04	240	X	X	f	1984-06-26	NO	-	-	-	-	-	-	-	-	-	-	-
2022-04-04	241	X	X	m	1973-02-24	NO	-	-	-	-	-	-	-	-	-	-	-
2022-04-05	242	X	X	f	1971-05-28	NO	-	-	-	-	-	-	-	-	-	-	-
2022-04-07	252	X	X	f	1966-04-16	NO	-	-	-	-	-	-	-	-	-	-	-
2022-04-07	253	X	X	f	1967-07-10	NO	-	-	-	-	-	-	-	-	-	-	-
2022-04-07	255	X	X	f	1989-12-16	NO	-	-	-	-	-	-	-	-	-	-	-
2022-04-07	257	X	X	f	2001-03-14	NO	-	-	-	-	-	-	-	-	-	-	-
2022-04-08	261	X	X	f	1956-12-19	NO	-	-	-	-	-	-	-	-	-	-	-
2022-04-12	280	X	X	m	1956-05-26	NO	-	-	-	-	-	-	-	-	-	-	-
2022-04-12	283	X	X	f	1977-03-24	NO	-	-	-	-	-	-	-	-	-	-	-
2022-04-13	291	X	X	f	1996-03-22	NO	-	-	-	-	-	-	-	-	-	-	-
2022-04-15	292	X	X	f	1992-03-20	NO	-	-	-	-	-	-	-	-	-	-	-
2022-04-19	296	X	X	f	1962-06-06	NO	-	-	-	-	-	-	-	-	-	-	-
2022-04-22	316	X	X	m	1977-12-25	NO	-	-	-	-	-	-		-	-	-	-
Jednokorzeniowe
2022-02-17	64	X	X	f	1990-01-22	YES	1	1	-	-	-	-	-	-	-	-	-
2022-03-21	171	X	X	f	1996-11-29	YES	1	1	-	-	-	-	-	-	-	-	-
2022-04-11	270	X	X	f	1976-11-08	YES	1	1	-	-	-	-	-	-	-	-	YES
2022-03-04	110	X	X	m	1996-01-18	YES	1	1	-	-	-	-	-	-	-	-	-
2022-03-07	116	X	X	m	1985-07-07	YES	1	1	-	-	-	-	-	-	-	-	YES
2022-03-29	212	X	X	m	1986-07-22	YES	1	1	-	-	-	-	-	-	-	-	-
2022-02-21	72	X	X	f	1992-04-13	YES	1	2	2	-	-	-	-	-	-	-	-
2022-02-08	31	X	X	f	1993-02-24	YES	1	4	4	-	-	-	-	-	-	-	-
2022-02-08	27	X	X	f	2961-11-20	YES	1	4	4	-	-	-	-	-	-	-	YES
2022-02-23	88	X	X	f	2000-04-16	YES	1	4	4	-	-	-	-	-	-	-	YES
2022-03-17	166	X	X	f	1976-10-15	YES	1	-	8	8	8	-	-	-	-	-	YES
2022-03-24	191	X	X	f	1974-05-09	YES	1	-	8	8	8	-	-	-	-	-	YES
Dwukorzeniowe
2022-02-04	7	X	X	f	1997-05-22	YES	2	1	1	-	-	-	-	-	-	-	-
2022-02-01	10	X	X	f	1997-01-04	YES	2	1	1	-	-	-	-	-	-	-	-
2022-02-08	30	X	X	f	1996-11-12	YES	2	1	1	-	-	-	-	-	-	-	-
2022-02-11	42	X	X	f	1996-11-12	YES	2	1	1	-	-	-	-	-	-	-	-
2022-02-11	43	X	X	f	1994-05-30	YES	2	1	1	-	-	-	-	-	-	-	-
2022-02-14	45	X	X	f	1997-11-10	YES	2	1	1	-	-	-	-	-	-	-	-
2022-02-14	48	X	X	f	1984-08-19	YES	2	1	1	-	-	-	-	-	-	-	-
2022-02-14	52	X	X	f	1996-06-27	YES	2	1	1	-	-	-	-	-	-	-	-
2022-02-18	68	X	X	f	1998-04-03	YES	2	1	1	-	-	-	-	-	-	-	-
2022-02-21	73	X	X	f	1998-09-28	YES	2	1	1	-	-	-	-	-	-	-	-
2022-02-21	75	X	X	f	1987-06-08	YES	2	1	1	-	-	-	-	-	-		-
2022-02-21	76	X	X	f	1999-10-14	YES	2	1	1	-	-	-	-	-	-	-	-
2022-02-22	86	X	X	f	1980-04-21	YES	2	1	1	-	-	-	-	-	-	-	-
2022-03-01	95	X	X	f	1959-08-20	YES	2	1	1	-	-	-	-	-	-	-	-
2022-03-01	103	X	X	f	1994-06-21	YES	2	1	1	-	-	-	-	-	-	-	-
2022-03-04	111	X	X	f	1992-11-25	YES	2	1	1	-	-	-	-	-	-	-	-
2022-03-07	115	X	X	f	1992-03-29	YES	2	1	1	-	-	-	-	-	-	-	-
2022-03-08	127	X	X	f	1993-09-09	YES	2	1	1	-	-	-	-	-	-	-	-
2022-03-08	128	X	X	f	1992-02-27	YES	2	1	1	-	-	-	-	-	-	-	-
2022-03-08	130	X	X	f	1998-05-13	YES	2	1	1	-	-	-	-	-	-	-	-
2022-03-08	134	X	X	f	1998-03-19	YES	2	1	1	-	-	-	-	-	-	-	-
2022-03-09	139	X	X	f	1998-08-31	YES	2	1	1	-	-	-	-	-	-	-	-
2022-03-16	162	X	X	f	27.07.1084	YES	2	1	1	-	-	-	-	-	-	-	-
2022-03-21	176	X	X	f	1998-02-22	YES	2	1	1	-	-	-	-	-	-	-	-
2022-03-21	180	X	X	f	1968-06-05	YES	2	1	1	-	-	-	-	-	-	-	-
2022-03-24	193	X	X	f	2001-02-22	YES	2	1	1	-	-	-	-	-	-	-	-
2022-03-25	195	X	X	f	1979-04-11	YES	2	1	1	-	-	-	-	-	-	-	-
2022-03-28	207	X	X	f	1991-09-03	YES	2	1	1	-	-	-	-	-	-	-	-
2022-03-29	214	X	X	f	1992-12-17	YES	2	1	1	-	-	-	-	-	-	-	-
2022-03-29	221	X	X	f	1996-02-13	YES	2	1	1	-	-	-	-	-	-	-	-
2022-03-30	227	X	X	f	1966-03-14	YES	2	1	1	-	-	-	-	-	-	-	-
2022-04-01	236	X	X	f	1967-01-07	YES	2	1	1	-	-	-	-	-	-	-	-
2022-04-06	251	X	X	f	1958-11-06	YES	2	1	1	-	-	-	-	-	-	-	-
2022-04-08	263	X	X	f	1990-06-29	YES	2	1	1	-	-	-	-	-	-	-	-
2022-04-11	267	X	X	f	1992-01-21	YES	2	1	1	-	-	-	-	-	-	-	-
2022-04-19	295	X	X	f	1958-06-04	YES	2	1	1	-	-	-	-	-	-	-	-
2022-04-21	303	X	X	f	2000-04-14	YES	2	1	1	-	-	-	-	-	-	-	-
2022-04-22	313	X	X	f	1982-12-31	YES	2	1	1	-	-	-	-	-	-	-	-
2022-04-22	315	X	X	f	1999-11-29	YES	2	1	1	-	-	-	-	-	-	-	-
2022-02-10	40	X	X	f	1992-03-30	YES	2	1	1						-	-	-
2022-01-31	16	X	X	m	1993-12-14	YES	2	1	1	-	-	-	-	-	-	-	-
2022-01-31	17	X	X	m	1994-10-03	YES	2	1	1	-	-	-	-	-	-	-	-
2022-01-31	25	X	X	m	1985-05-16	YES	2	1	1	-	-	-	-	-	-	-	-
2022-02-14	50	X	X	m	1974-04-30	YES	2	1	1	-	-	-	-	-	-	-	-
2022-02-22	84	X	X	m	1983-02-05	YES	2	1	1	-	-	-	-	-	-	-	-
2022-03-01	98	X	X	m	1995-12-16	YES	2	1	1	-	-	-	-	-	-	-	-
2022-03-07	120	X	X	m	1992-03-05	YES	2	1	1	-	-	-	-	-	-	-	-
2022-03-14	146	X	X	m	2000-01-04	YES	2	1	1	-	-	-	-	-	-	-	-
2022-03-15	153	X	X	m	1996-05-28	YES	2	1	1	-	-	-	-	-	-	-	-
2022-03-15	158	X	X	m	1996-05-27	YES	2	1	1	-	-	-	-	-	-	-	-
2022-03-25	198	X	X	m	1998-01-15	YES	2	1	1	-	-	-	-	-	-	-	-
2022-03-28	205	X	X	m	1994-04-20	YES	2	1	1	-	-	-	-	-	-	-	-
2022-03-30	223	X	X	m	1974-07-23	YES	2	1	1	-	-	-	-	-	-	-	-
2022-03-30	225	X	X	m	1997-07-11	YES	2	1	1	-	-	-	-	-	-	-	-
2022-04-01	234	X	X	m	1981-06-30	YES	2	1	1	-	-	-	-	-	-	-	-
2022-04-01	235	X	X	m	1992-11-19	YES	2	1	1	-	-	-	-	-	-	-	-
2022-04-04	238	X	X	m	1952-02-08	YES	2	1	1	-	-	-	-	-	-	-	-
2022-04-06	249	X	X	m	1992-01-24	YES	2	1	1	-	-	-	-	-	-	-	-
2022-04-11	264	X	X	m	1971-11-14	YES	2	1	1	-	-	-	-	-	-	-	-
2022-04-12	277	X	X	m	1962-12-13	YES	2	1	1	-	-	-	-	-	-	-	-
2022-04-12	285	X	X	m	1986-11-05	YES	2	1	1	-	-	-	-	-	-	-	-
2022-04-13	286	X	X	m	1989-02-02	YES	2	1	1	-	-	-	-	-	-	-	-
2022-04-19	297	X	X	m	1994-03-26	YES	2	1	1	-	-	-	-	-	-	-	-
2022-04-21	305	X	X	m	1993-08-17	YES	2	1	1	-	-	-	-	-	-	-	-
2022-03-01	100	X	X	f	1995-11-29	YES	2	1	1	-	-	-	-	-	-	-	-
2022-02-09	35	X	X	m	2000-06-01	YES	2	1	-	-	-	-	4	4	-	-	-
2022-04-21	304	X	X	m	1978-04-06	YES	2	2	1	-	-	-	-	-	-	-	-
2022-02-01	11	X	X	m	1990-08-27	YES	2	5	1	-	-	-	-	-	-	-	-
2022-02-14	46	X	X	f	1998-02-20	YES	2	-	1	2	2	-	-	-	-	-	-
2022-02-25	91	X	X	f	1956-08-30	YES	2	-	1	2	2	-	-	-	-	-	-
2022-04-11	276	X	X	f	1951-05-19	YES	2	-	1	2	2
2022-03-07	122	X	X	m	1987-02-26	YES	2	-	1	2	2	-	-	-	-	-	-
2022-04-22	308	X	X	f	1990-10-05	YES	2	-	1	4	4	-	-	-	-	-	-
2022-02-01	14	X	X	f	1975-11-13	YES	2	-	1	4	4	-	-	-	-	-	-
2022-01-31	19	X	X	f	1990-10-27	YES	2	-	1	4	4	-	-	-	-	-	-
2022-02-08	26	X	X	f	1961-11-20	YES	2	-	1	4	4	-	-	-	-	-	-
2022-02-10	39	X	X	f	1993-02-04	YES	2	-	1	4	4	-	-	-	-	-	-
2022-03-01	97	X	X	f	1981-10-29	YES	2	-	1	4	4	-	-	-	-	-	-
2022-03-04	112	X	X	f	1975-04-27	YES	2	-	1	4	4	-	-	-	-	-	-
2022-03-15	150	X	X	f	1963-03-05	YES	2	-	1	4	4	-	-	-	-	-	-
2022-03-21	173	X	X	f	1996-09-18	YES	2	-	1	4	4	-	-	-	-	-	-
2022-04-08	259	X	X	f	1977-05-27	YES	2	-	1	4	4	-	-	-	-	-	-
2022-04-21	306	X	X	f	1993-02-28	YES	2	-	1	4	4	-	-	-	-	-	-
2022-02-14	47	X	X	f	1998-02-20	YES	2	-	1	4	4	-	-	-	-	-	YES
2022-04-05	243	X	X	m	1999-12-02	YES	2	-	1	4	4	-	-	-	-	-	-
2022-02-07	1	X	X	m	1996-09-27	YES	2	-	1	4	4	-	-	-	-	-	-
2022-01-31	23	X	X	m	1981-05-16	YES	2	-	1	4	4	-	-	-	-	-	-
2022-02-21	70	X	X	m	2000-07-13	YES	2	-	1	4	4	-	-	-	-	-	-
2022-02-21	71	X	X	m	1986-09-25	YES	2	-	1	4	4	-	-	-	-	-	-
2022-02-23	87	X	X	m	1954-09-21	YES	2	-	1	4	4	-	-	-	-	-	-
2022-03-08	126	X	X	m	1996-03-22	YES	2	-	1	4	4	-	-	-	-	-	-
2022-03-09	138	X	X	m	1998-11-10	YES	2	-	1	4	4	-	-	-	-	-	-
2022-03-15	151	X	X	m	1983-12-30	YES	2	-	1	4	4	-	-	-	-	-	-
2022-03-21	174	X	X	m	1978-08-21	YES	2	-	1	4	4	-	-	-	-	-	-
2022-03-21	179	X	X	m	1968-06-05	YES	2	-	1	4	4	-	-	-	-	-	-
2022-04-07	254	X	X	m	1975-11-30	YES	2	-	1	4	4	-	-	-	-	-	-
2022-04-11	268	X	X	m	1993-03-13	YES	2	-	1	4	4	-	-	-	-	-	-
2022-04-11	269	X	X	m	1997-08-05	YES	2	-	1	4	4	-	-	-	-	-	-
2022-04-13	289	X	X	m	1999-02-21	YES	2	-	1	4	4	-	-	-	-	-	-
2022-04-20	299	X	X	m	1951-05-26	YES	2	-	1	4	4	-	-	-	-	-	-
2022-04-20	301	X	X	m	1988-04-15	YES	2	-	1	4	4	-	-	-	-	-	-
2022-04-21	302	X	X	m	1995-01-21	YES	2	-	1	4	4	-	-	-	-	-	-
2022-04-22	311	X	X	m	1994-01-10	YES	2	-	1	4	4	-	-	-	-	-	-
2022-02-10	36	X	X	m	2000-07-03	YES	2		1	4	4	-	-	-	-	-	-
2022-04-05	245	X	X	m	1991-06-04	YES	2		1	4	4	-	-	-	-	-	-
2022-01-31	20	X	X	m	1994-05-19	YES	2	-	1	4	4	-	-		-	-	-
2022-02-10	37	X	X	f	2004-09-06	YES	2	-	1	6	6	-	-	-	-	-	-
2022-04-08	262	X	X	m	1974-02-10	YES	2	-	1	8	8	8	-	-	-	-	-
2022-02-22	85	X	X	f	2001-02-22	YES	2	-	-	4	4	-	4	4	-	-	-
Trzykorzeniowe
2022-03-01	101	X	X	f	1983-05-20	YES	3	1	-	-	-	-	1	1	-	-	-
2022-03-02	108	X	X	f	1978-07-24	YES	3	1	-	-	-	-	1	1	-	-	-
2022-03-22	182	X	X	f	1996-07-17	YES	3	1	-	-	-	-	1	1	-	-	-
2022-02-14	51	X	X	f	1995-04-13	YES	3	-	1	1	1	-	-	-	-	-	-
2022-02-21	81	X	X	m	1995-12-30	YES	3	-	1	1	1	-	-	-	-	-	-
2022-03-08	132	X	X	m	1983-08-18	YES	3	-	1	1	1	-	-	-	-	-	-
2022-03-16	164	X	X	f	1981-04-28	YES	3	-	1	1	1	-	-	-	-	-	-
2022-03-30	224	X	X	f	1999-05-07	YES	3	-	1	1	1	-	-	-	-	-	-
2022-04-05	248	X	X	f	1988-08-11	YES	3	-	1	1	1	-	-	-	-	-	-
2022-04-06	250	X	X	f	2002-08-16	YES	3	-	1	1	1	-	-	-	-	-	-
2022-04-13	290	X	X	m	1992-04-26	YES	3	-	1	1	1	-	-	-	-	-	-
2022-04-22	310	X	X	m	1981-05-07	YES	3	-	1	1	1	-	-	-	-	-	-
2022-02-08	32	X	X	f	1999-02-17	YES	3	-	-	1	1	-	4	4	-	-	-
2022-04-12	278	X	X	f	2000-04-08	YES	3	-	-	4	4	-	1	1	-	-	-
YES - tooth is present and to evaluate			YES	135
NO - tooth absent			NO	81
A technical problem, impossible to read the file			A	17
B - image did not cover the tooth			B	35
C - image did not cover the apices			C	13
D - caries			D	1
E - filling			E	1
F - open apex			F	3
G - Under 18 y.o.			G	23
H - tooth after endodontic treatment			H	6
I - under the prosthetic crown			I	0
J - only root present			J	0
K - after endodontic treatment and with prosthetic crown			K	0
L - after endodontic treatment with a filling			L	1
			SUMA	316
				Amount	frequency	female	frequency	male	frequency
			1 rooted	12	0.0888889	9	0.75	3	0.25
			2 rooted	109	0.807407	58	0.53211	51	0.46789
			3 rooted	14	0.103704	10	0.714286	4	0.285714
			Sum	135	1	77	0.57037	58	0.42963
			Amount	Frequency		female	frequency	male	frequency
1 rooted Vertucci Type 1			6	0.5		3	0.5	3	0.5
1 rooted Vertucci Type 2			1	0.0833333		1	1	0	0
1 rooted Vertucci Type 4			3	0.25		3	1	0	0
1 rooted Vertucci Type 8			2	0.166667		2	1	0	0
SUM:			12	1		9	0.75	3	0.25
					Amount	Frequency	female	frequency	male	frequency
2 rooted Vertucci Type 1 in M & D root					65	0.59633	41	0.630769	24	0.369231
2 rooted Vertucci Type 1 in M root & Type 4 in D root					1	0.00917431	0	0	1	1
2 rooted Vertucci Type 2 in M root & Type 1 D root					1	0.00917431	0	0	1	1
2 rooted Vertucci Type 5 in M & Type 1 D root					1	0.00917431	0	0	1	1
2 rooted Vertucci Type 1 in M root & Type 2 in D root					4	0.0366972	3	0.75	1	0.25
2 rooted Vertucci Type 4 in M root & Type 1 in D root					34	0.311927	12	0.352941	22	0.647059
2 rooted Vertucci Type 1 in M root & Type 6 in D root					1	0.00917431	1	1	0	0
2 rooted Vertucci Type 1 in M root & Type 8 in D root					1	0.00917431	0	0	1	1
2 rooted Vertucci Type 4 in M & Type 4 in D root					1	0.00917431	1	1	0	0
SUM:					109	1	56	0.513761	50	0.458716
					Amount	Frequency	female	frequency	male	frequency
	3 rooted Vertucci Type 1 in M, DB & DL root				3	0.214286	3	1	0	0
	3 rooted Vertucci Type 1 in MB, ML & D root				9	0.642857	5	0.555556	4
	3 rooted Vertucci Type 1 in MB &ML root & Type 4 in D root				1	0.0714286	1	1	0	0
	3 rooted Vertucci Type 4 in M root & Type 1 in DB & DL root				1	0.0714286	1	1	0	0
	SUM				14	1	10	0.714286	4	0.285714
	C-shaped canal	Amount	Female	Frequency	Male	Frequency
	1 rooted	6	5	0.833333	1	0.166667
	2 rooted	1	1	1	0	0
	SUM	7	6	0.857143	0	0
Podsumowanie 38 i 48
YES - tooth is present and to evaluate			YES	261
NO - tooth absent			NO	173
A technical problem, impossible to read the file			A	34
B - image did not cover the tooth			B	66
C - image did not cover the apices			C	29
D - caries			D	6
E - filling			E	2
F - open apex			F	6
G - Under 18 y.o.			G	46
H - tooth after endodontic treatment			H	8
I - under the prosthetic crown			I	0
J - only root present			J	0
K - after endodontic treatment and with prosthetic crown			K	0
L - after endodontic treatment with a filling			L	1
			SUM	632
			Amount	frequency	female	frequency	male	frequency
		1 rooted	22	0.0842912	18	0.119205	4	0.0363636
		2 rooted	208	0.796935	112	0.741722	96	0.872727
		3 rooted	31	0.118774	21	0.139073	10	0.0909091
		Sum	261	1	151	0.578544	110	0.421456
			Amount	Frequency		female	frequency	male	frequency
1 rooted Vertucci Type 1			9	0.409091		6	0.666667	3	0.333333
1 rooted Vertucci Type 2			2	0.0909091		2	1	0	0
1 rooted Vertucci Type 4			7	0.318182		6	0.857143	1	0.142857
1 rooted Vertucci Type 5			1	0.0454545		1	1	0	0
1 rooted Vertucci Type 8			3	0.136364		3	1	0	0
SUM:			22	1		18	0.818182	4	0.181818
				Amount	Frequency	female	frequency	male	frequency
2 rooted Vertucci Type 1 in M & D root				123	0.591346	75	0.609756	48	0.390244
(Fused 2 rooted Vertucci Type 1 in M & D root)				1	0.00480769	0	0	1	1
2 rooted Vertucci Type 1 in M root & Type 2 in D root				4	0.0192308	3	0.75	1	0.25
2 rooted Vertucci Type 1 in M root & Type 4 in D root				4	0.0192308	1	0.25	3	0.75
2 rooted Vertucci Type 1 in M root & Type 6 in D root				1	0.00480769	1	1	0	0
2 rooted Vertucci Type 1 in M root & Type 8 in D root				1	0.00480769	0	0	1	1
2 rooted Vertucci Type 2 in M root & Type 1 D root				8	0.0384615	4	0.5	4	0.5
2 rooted Vertucci Type 3 in M root & Type 1 D root				2	0.00961538	1	0.5	1	0.5
2 rooted Vertucci Type 5 in M root & Type 1 D root				3	0.0144231	2	0.666667	1	0.333333
(Fused 2 rooted Vertucci Type 5 in M & Type 1 D root)				1	0.00480769	1	1	0	0
2 rooted Vertucci Type 4 in M root & Type 1 in D root				61	0.293269	24	0.393443	37	0.606557
2 rooted Vertucci Type 4 in M root & Type 4 in D root				1	0.00480769	1	1	0	0
SUM:				208	1	112	0.538462	96	0.461538
Sum of fused roots				2	0.00961538	1	0.5	1	0.5
				Amount	Frequency	female	frequency	male	frequency
3 rooted Vertucci Type 1 in M, DB & DL root				5	0.16129	4	0.8	1	0.25
3 rooted Vertucci Type 1 in M &DB root & Type 5 in DL root				1	0.0322581	1	1	0	0
3 rooted Vertucci Type 1 in MB, ML & D root				22	0.709677	13	0.590909	9	0.409091
3 rooted Vertucci Type 1 in MB &ML root & Type 4 in D root				1	0.0322581	1	1	0	0
3 rooted Vertucci Type 4 in M root & Type 1 in DB & DL root				2	0.0645161	2	1	0	0
SUM				31	1	21	0.677419	10	0.322581
C-shaped canal	Amount	Frequency	Female	Frequency	Male	Frequency
1 rooted	10	0.714286	9	0.9	1	0.1
2 rooted	4	0.285714	4	1	0	0
SUM	14	1	13	0.928571	1	0.0714286
