# Supplementary material for: Morphology of Third Mandibular Molars – An In Vivo Cone Beam Computed Tomography Study in Lower Silesia
Source: Research Square preprint supplement (doi:10.21203/rs.3.rs-8282672/v1), 2026-02-09
Supplement: Supplementary file 3 [file 2e48e4fae82504c1ace4d5cd.docx]

| Number of roots | Row Labels | Female (%) | Male (%) |
| --- | --- | --- | --- |
| 1 | Present study | 11.9 | 3.6 |
|  | Jing et al..(1) | 23.6 | 13.1 |
|  | Somasundaram et al..(2) | 0.9 | 0.1 |
| 2 | Present study | 74.2 | 87.3 |
|  | Jing et al.. | 69.1 | 78.9 |
|  | Somasundaram et al.. | 0.3 | 0.7 |
| 3 | Present study | 13.9 | 9.1 |
|  | Jing et al.. | 6.8 | 7.9 |
|  | Somasundaram et al.. | 0.5 | 0.5 |
| 4 | Present study | 0 | 0 |
|  | Jing et al.. | 0.5 | 0.1 |
|  | Somasundaram et al.. | 0 | 0 |
| 5 | Present study | 0 | 0 |
|  | Jing et al.. | 0.5 | 0.1 |
|  | Somasundaram et al.. | 0 | 1 |

Supplement 3 Gender-Based Distribution of MTMs with Different Root Numbers in the Present Study and Previous Studies
